# Supplementary material for: Effects of precipitation and clipping intensity on net primary productivity and composition of a Leymus chinensis temperate grassland steppe
Source: PLoS One. 2017 Dec 29;12(12):e0190450. doi: 10.1371/journal.pone.0190450 (PMC5747479; doi:10.1371/journal.pone.0190450)
Supplement: S1 File — (XLSX) [file pone.0190450.s001.xlsx]

## Sheet: supporting data
precipitation treatment	precipitation treatment Value	clipping treatment	Clipping Treatment Value	plot number	year	Natural precipitation(mm)	plot actual precipitation (mm)	dry matter of L chinensis DML (g/m2)	dry matter of others DMO(g/m2)	NPP(g/m2)	Ratio of L chinensis to NPP IVL (%)
water reduction	0.5	once each year	1	4	2005	216.7	108.35	66.48	58.48	124.96	53.201
water reduction	0.5	once each year	1	8	2005	216.7	108.35	95.5	57.88	153.38	62.2637
water reduction	0.5	once each year	1	11	2005	216.7	108.35	117.14	14.94	132.08	88.6887
water reduction	0.5	once each year	1	4	2006	311.79	155.895	48.96	113.48	162.44	30.1404
water reduction	0.5	once each year	1	8	2006	311.79	155.895	83.48	94.96	178.44	46.7832
water reduction	0.5	once each year	1	11	2006	311.79	155.895	107.32	10.36	117.68	91.1965
water reduction	0.5	once each year	1	4	2007	290.82	145.41	51	34.92	85.92	59.3575
water reduction	0.5	once each year	1	8	2007	290.82	145.41	70	63.56	133.56	52.4109
water reduction	0.5	once each year	1	11	2007	290.82	145.41	103.04	16.48	119.52	86.2115
water reduction	0.5	once each year	1	4	2009	113.5	56.75	72.1	18.025	90.125	80
water reduction	0.5	once each year	1	8	2009	113.5	56.75	38.955	58.4325	97.3875	40
water reduction	0.5	once each year	1	11	2009	113.5	56.75	89.775	14.9625	104.737	85.7143
water reduction	0.5	once each year	1	4	2010	244.15	122.075	80.7767	23.3495	104.126	77.5758
water reduction	0.5	once each year	1	8	2010	244.15	122.075	97.0414	17.2518	114.293	84.9057
water reduction	0.5	once each year	1	11	2010	244.15	122.075	116.643	11.5	128.143	91.0256
water reduction	0.5	once each year	1	4	2011	198.6	99.3	60.4	16.3	76.7	78.7484
water reduction	0.5	once each year	1	8	2011	198.6	99.3	53.6	53.3	106.9	50.1403
water reduction	0.5	once each year	1	11	2011	198.6	99.3	43.2	14.1	57.3	75.3927
water reduction	0.5	twice each year	2	1	2005	216.7	108.35	150.56	6.44	157	95.8981
water reduction	0.5	twice each year	2	15	2005	216.7	108.35	120.4	55.8	176.2	68.3314
water reduction	0.5	twice each year	2	18	2005	216.7	108.35	111.96	36.6	148.56	75.3635
water reduction	0.5	twice each year	2	1	2006	311.79	155.895	182.82	28.5	211.32	86.5133
water reduction	0.5	twice each year	2	15	2006	311.79	155.895	95.74	82.08	177.82	53.841
water reduction	0.5	twice each year	2	18	2006	311.79	155.895	102.98	80.1	183.08	56.2486
water reduction	0.5	twice each year	2	1	2007	290.82	145.41	121.88	51.4	173.28	70.337
water reduction	0.5	twice each year	2	15	2007	290.82	145.41	47.88	81.52	129.4	37.0015
water reduction	0.5	twice each year	2	18	2007	290.82	145.41	90.88	58.16	149.04	60.9769
water reduction	0.5	twice each year	2	1	2009	113.5	56.75	130.85	35.65	166.5	78.5886
water reduction	0.5	twice each year	2	15	2009	113.5	56.75	102.289	36.2983	138.588	73.8084
water reduction	0.5	twice each year	2	18	2009	113.5	56.75	107.275	34.5625	141.838	75.6323
water reduction	0.5	twice each year	2	1	2010	244.15	122.075	96.1326	72.1374	168.27	57.13
water reduction	0.5	twice each year	2	15	2010	244.15	122.075	65.5881	69.3764	134.964	48.5966
water reduction	0.5	twice each year	2	18	2010	244.15	122.075	83.0466	36.4884	119.535	69.4747
water reduction	0.5	twice each year	2	1	2011	198.6	99.3	52.3	33.7	86	60.814
water reduction	0.5	twice each year	2	15	2011	198.6	99.3	39.8	60.6	100.4	39.6414
water reduction	0.5	twice each year	2	18	2011	198.6	99.3	42.1	17.7	59.8	70.4013
ambient	1	once each year	1	3	2005	216.7	216.7	90.5	47.18	137.68	65.7321
ambient	1	once each year	1	7	2005	216.7	216.7	142.44	32.64	175.08	81.3571
ambient	1	once each year	1	13	2005	216.7	216.7	98.68	87.64	186.32	52.9626
ambient	1	once each year	1	3	2006	311.79	311.79	56.84	85.88	142.72	39.8262
ambient	1	once each year	1	7	2006	311.79	311.79	188.12	116.76	304.88	61.703
ambient	1	once each year	1	13	2006	311.79	311.79	95.2	103.84	199.04	47.8296
ambient	1	once each year	1	3	2007	290.82	290.82	45.68	43.96	89.64	50.9594
ambient	1	once each year	1	7	2007	290.82	290.82	141.84	32.4	174.24	81.405
ambient	1	once each year	1	13	2007	290.82	290.82	52.24	88.52	140.76	37.1128
ambient	1	once each year	1	3	2009	113.5	113.5	66.85	66.85	133.7	50
ambient	1	once each year	1	7	2009	113.5	113.5	87.8063	48.7812	136.588	64.2857
ambient	1	once each year	1	13	2009	113.5	113.5	105.01	30.0028	135.012	77.7778
ambient	1	once each year	1	3	2010	244.15	244.15	111.31	71.0488	182.359	61.039
ambient	1	once each year	1	7	2010	244.15	244.15	127.472	65.2657	192.738	66.1376
ambient	1	once each year	1	13	2010	244.15	244.15	150.048	25.1905	175.238	85.625
ambient	1	once each year	1	3	2011	198.6	198.6	70.9	38.9	109.8	64.5719
ambient	1	once each year	1	7	2011	198.6	198.6	102.6	33.5	136.1	75.3857
ambient	1	once each year	1	13	2011	198.6	198.6	76.3	30.3	106.6	71.576
ambient	1	twice each year	2	6	2005	216.7	216.7	134.8	99.76	234.56	57.4693
ambient	1	twice each year	2	10	2005	216.7	216.7	133.24	47.96	181.2	73.532
ambient	1	twice each year	2	16	2005	216.7	216.7	99.16	33.4	132.56	74.8039
ambient	1	twice each year	2	6	2006	311.79	311.79	102.48	117.66	220.14	46.5522
ambient	1	twice each year	2	10	2006	311.79	311.79	139.66	55.56	195.22	71.5398
ambient	1	twice each year	2	16	2006	311.79	311.79	97.36	103.82	201.18	48.3945
ambient	1	twice each year	2	6	2007	290.82	290.82	69.12	134.88	204	33.8824
ambient	1	twice each year	2	10	2007	290.82	290.82	97.64	85.4	183.04	53.3435
ambient	1	twice each year	2	16	2007	290.82	290.82	64.4	112.84	177.24	36.3349
ambient	1	twice each year	2	6	2009	113.5	113.5	116.667	47.8333	164.5	70.922
ambient	1	twice each year	2	10	2009	113.5	113.5	91.6344	24.8281	116.462	78.6814
ambient	1	twice each year	2	16	2009	113.5	113.5	95.4567	55.5683	151.025	63.2059
ambient	1	twice each year	2	6	2010	244.15	244.15	156.941	74.1921	231.133	67.9007
ambient	1	twice each year	2	10	2010	244.15	244.15	90.5219	79.1903	169.712	53.3385
ambient	1	twice each year	2	16	2010	244.15	244.15	136.097	85.2343	221.332	61.4902
ambient	1	twice each year	2	6	2011	198.6	198.6	61	77.1	138.1	44.1709
ambient	1	twice each year	2	10	2011	198.6	198.6	67.4	44.8	112.2	60.0713
ambient	1	twice each year	2	16	2011	198.6	198.6	52.9	62.4	115.3	45.8803
water addition	1.5	once each year	1	5	2005	216.7	325.05	81.68	77.1	158.78	51.4422
water addition	1.5	once each year	1	12	2005	216.7	325.05	134.98	16.04	151.02	89.3789
water addition	1.5	once each year	1	17	2005	216.7	325.05	125.7	47.46	173.16	72.5918
water addition	1.5	once each year	1	5	2006	311.79	467.685	53.26	91.4	144.66	36.8174
water addition	1.5	once each year	1	12	2006	311.79	467.685	93.56	79.16	172.72	54.1686
water addition	1.5	once each year	1	17	2006	311.79	467.685	76.94	129.8	206.74	37.2158
water addition	1.5	once each year	1	5	2007	290.82	436.23	50.28	90.92	141.2	35.6091
water addition	1.5	once each year	1	12	2007	290.82	436.23	78.8	72.6	151.4	52.0476
water addition	1.5	once each year	1	17	2007	290.82	436.23	90	103.04	193.04	46.6225
water addition	1.5	once each year	1	5	2009	113.5	170.25	98.2333	49.1167	147.35	66.6667
water addition	1.5	once each year	1	12	2009	113.5	170.25	68.6	51.45	120.05	57.1429
water addition	1.5	once each year	1	17	2009	113.5	170.25	87.9667	43.9833	131.95	66.6667
water addition	1.5	once each year	1	5	2010	244.15	366.225	63.8616	72.5095	136.371	46.8293
water addition	1.5	once each year	1	12	2010	244.15	366.225	96.7548	59.9459	156.701	61.745
water addition	1.5	once each year	1	17	2010	244.15	366.225	110.058	46.3401	156.398	70.3704
water addition	1.5	once each year	1	5	2011	198.6	297.9	53.8	106.1	159.9	33.646
water addition	1.5	once each year	1	12	2011	198.6	297.9	62.5	57.1	119.6	52.2575
water addition	1.5	once each year	1	17	2011	198.6	297.9	81.4	83.9	165.3	49.2438
water addition	1.5	twice each year	2	2	2005	216.7	325.05	134.88	25.28	160.16	84.2158
water addition	1.5	twice each year	2	9	2005	216.7	325.05	37.56	101.92	139.48	26.9286
water addition	1.5	twice each year	2	14	2005	216.7	325.05	109.64	73.8	183.44	59.7689
water addition	1.5	twice each year	2	2	2006	311.79	467.685	138.1	42.18	180.28	76.6031
water addition	1.5	twice each year	2	9	2006	311.79	467.685	73.46	173.48	246.94	29.7481
water addition	1.5	twice each year	2	14	2006	311.79	467.685	77.16	107.5	184.66	41.7849
water addition	1.5	twice each year	2	2	2007	290.82	436.23	121.32	76.12	197.44	61.4465
water addition	1.5	twice each year	2	9	2007	290.82	436.23	38.32	147.28	185.6	20.6466
water addition	1.5	twice each year	2	14	2007	290.82	436.23	43.08	181.44	224.52	19.1876
water addition	1.5	twice each year	2	2	2009	113.5	170.25	87.2077	56.4673	143.675	60.6979
water addition	1.5	twice each year	2	9	2009	113.5	170.25	62.5333	44.6542	107.188	58.3401
water addition	1.5	twice each year	2	14	2009	113.5	170.25	84.2431	88.5694	172.812	48.7482
water addition	1.5	twice each year	2	2	2010	244.15	366.225	46.19	83.91	130.1	35.5035
water addition	1.5	twice each year	2	9	2010	244.15	366.225	25.0952	126.118	151.213	16.5959
water addition	1.5	twice each year	2	14	2010	244.15	366.225	52.8843	84.8128	137.697	38.4063
water addition	1.5	twice each year	2	2	2011	198.6	297.9	35.7	115.1	150.8	23.6737
water addition	1.5	twice each year	2	9	2011	198.6	297.9	39.9	140.4	180.3	22.1298
water addition	1.5	twice each year	2	14	2011	198.6	297.9	43.2	117.5	160.7	26.8824
